# Supplementary material for: MALI-PAPAM-Aide-memoire- du 23 janv au 17 fev 2012.Finaldocx.docx
Source: Royal Society of Chemistry journal article supplement (doi:10.1039/c4an02180k), 2012-04-11
Supplement: c4an02180k1.pdf [file c4an02180k1.pdf]

Supplemental Figures 1-3 for “Superposition of an AC electric field improves the discrimination between peptides in nanopore analysis”.

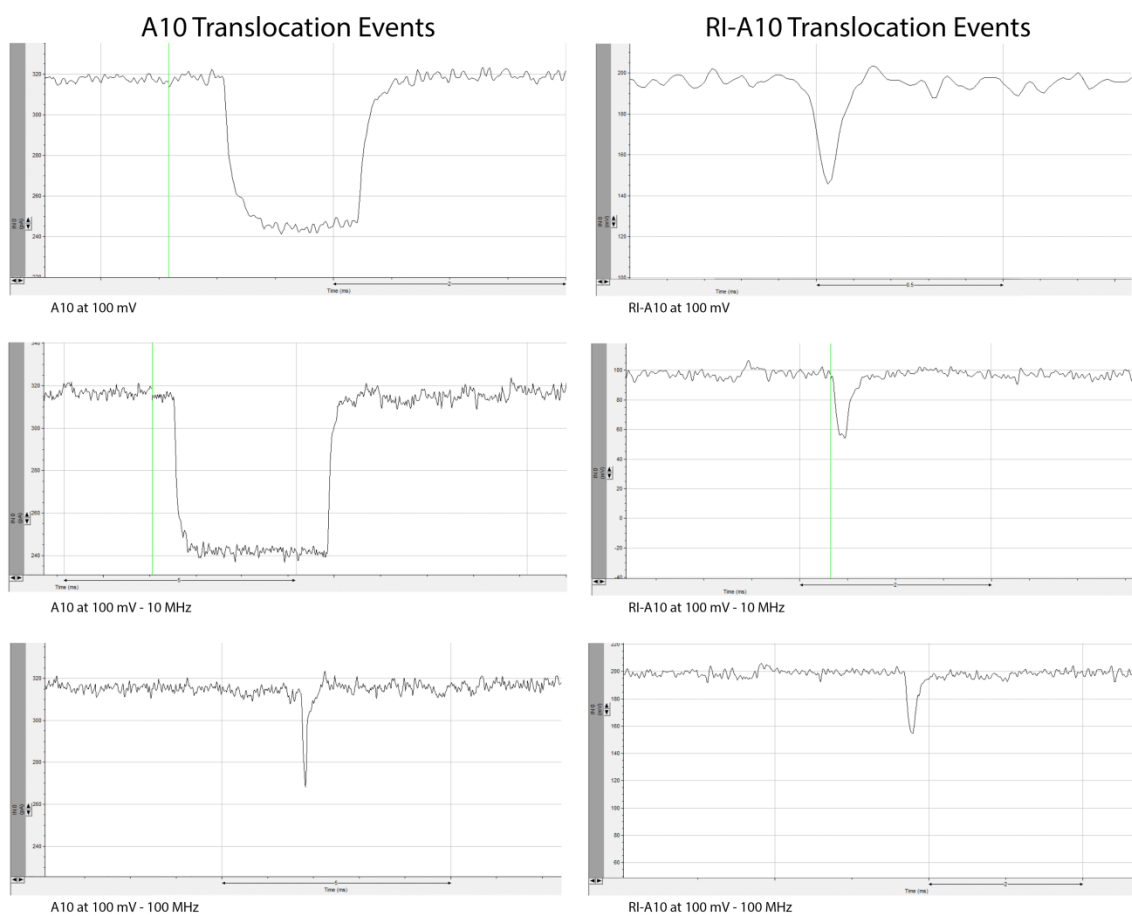

**Fig 1S.** Expanded screen shots for typical translocation events for A10 and RI-A10.

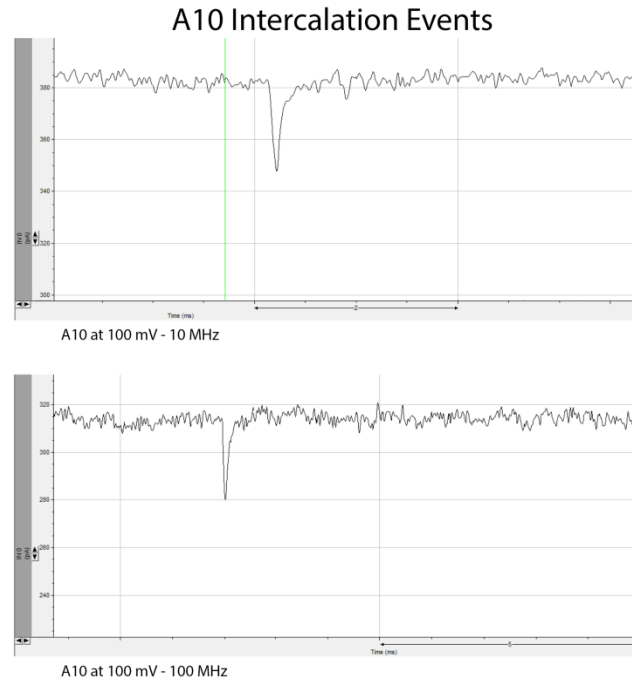

**Fig 2S.** Expanded screen shots for typical intercalation events for A10.

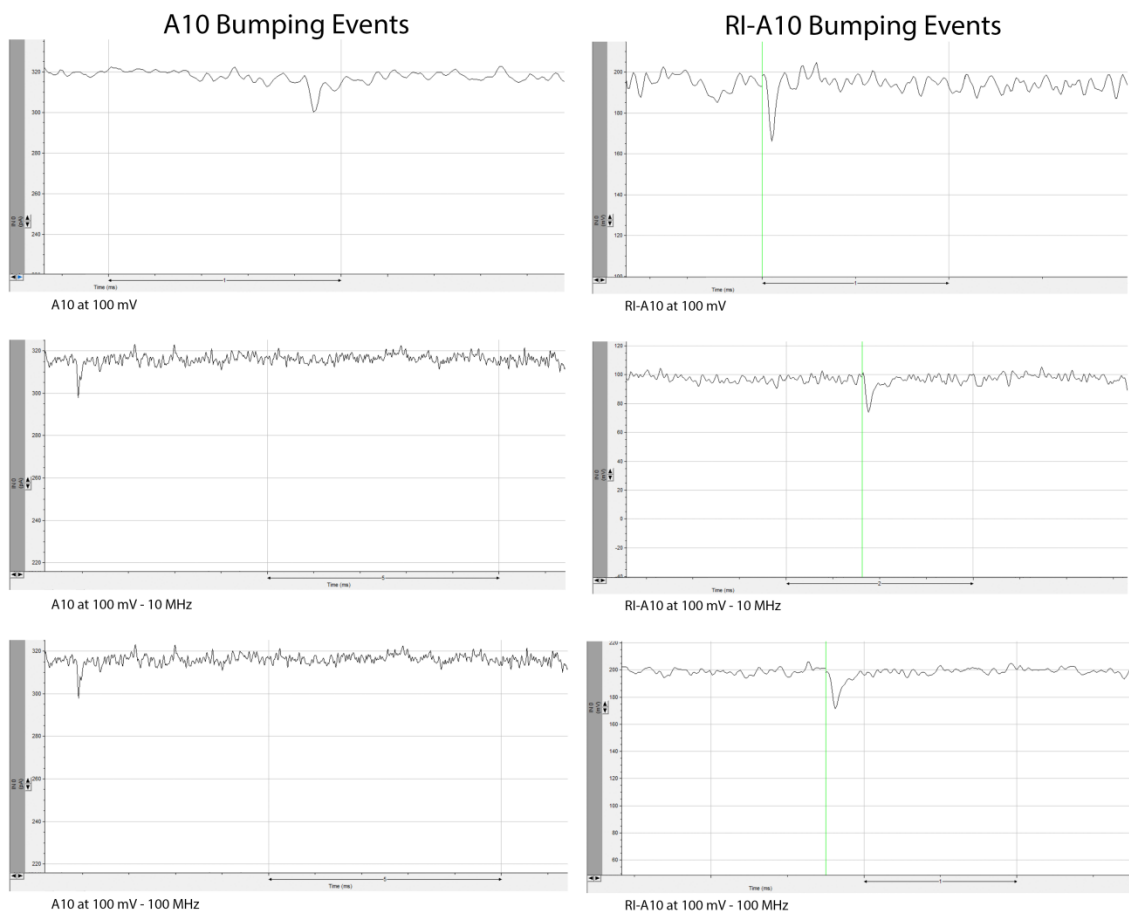

**Fig 3S.** Expanded screen shots for typical bumping events for A10 and RI-A10.
